# Supplementary material
Source: PubMed Central journal article supplement (PMC4780051)
Supplement: NIHMS761844-supplement-supplement.pdf [file NIHMS761844-supplement-supplement.pdf]

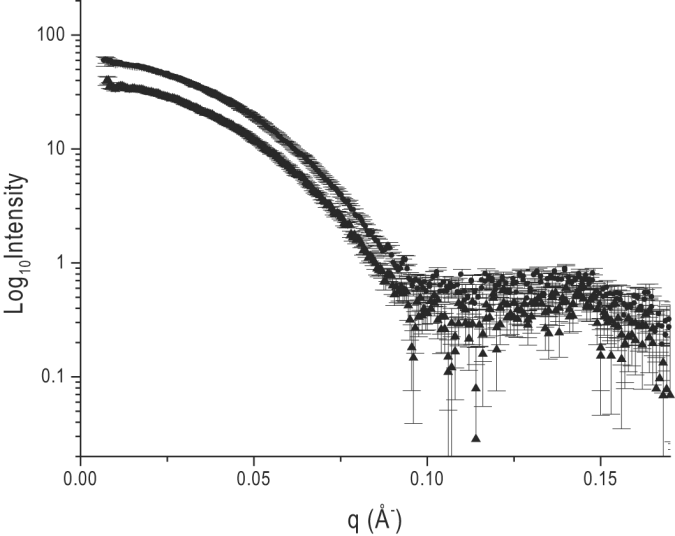

SUPPLEMENTAL FIGURE 1. I(q) scattering data for the apo form of ct-AChBP at 2.85 (circles) and 1.9 (triangles) mg/ml.

A

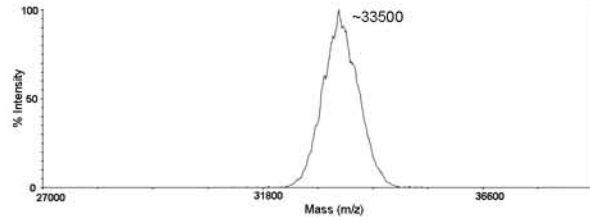

B

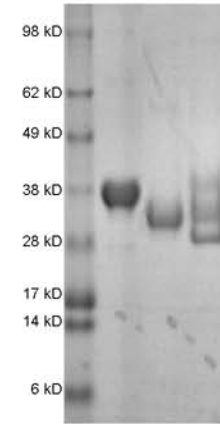

C

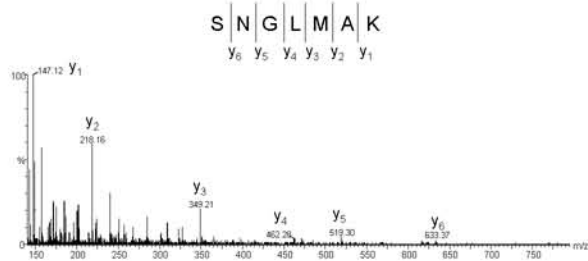

D

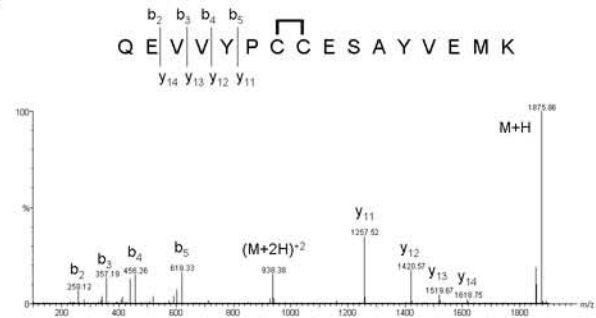

SUPPLEMENTAL FIGURE 2. A) MALDI-TOF spectrum of intact purified HEK293 expressed ct-AChBP indicates an average mass of approximately 33.5 kDa. B). Polyacrylamide gel of PNGase-treated ct-AChBP. Lane 1 is molecular weight markers; lane 2 untreated ct-AChBP; lane 3 ct-AChBP treated with 1 unit of PNGase F overnight at 37 °C; lane 4 ct-AChBP treated with 1 unit of PNGase F overnight at 37 °C in the presence of 2.5 M urea. C). ESI-MS/MS of ion m/z 360.69 with an extensive y-ion series which identifies the peptide as SNGLMAK. D). ESI-MS/MS of ion m/z 938.55 with b- and y-ion series that identify the peptide as QEVVYPCCESAYVEMK with Cys196 and Cys197 disulfide bonded.
